# Supplementary material for: Muscarinic receptors stimulate AC2 by novel phosphorylation sites, whereas Gβγ subunits exert opposing effects depending on the G-protein source
Source: PubMed Central journal article supplement — Biochem J. 2012 Oct 5;447(Pt 3):393–405. doi: 10.1042/BJ20120279 (PMC3465989; doi:10.1042/bj20120279), 2012-10-05
Supplement: bj4470393add.pdf [file bj4470393add.pdf]

## SUPPLEMENTARY ONLINE DATA

# Muscarinic receptors stimulate AC2 by novel phosphorylation sites, whereas $G\beta\gamma$ subunits exert opposing effects depending on the G-protein source

Jia X. SHEN, Sebastian WACHTEN, Michelle L. HALLS, Katy L. EVERETT and Dermot M. F. COOPER<sup>1</sup>

Department of Pharmacology, University of Cambridge, Tennis Court Road, Cambridge CB2 1PD, U.K.

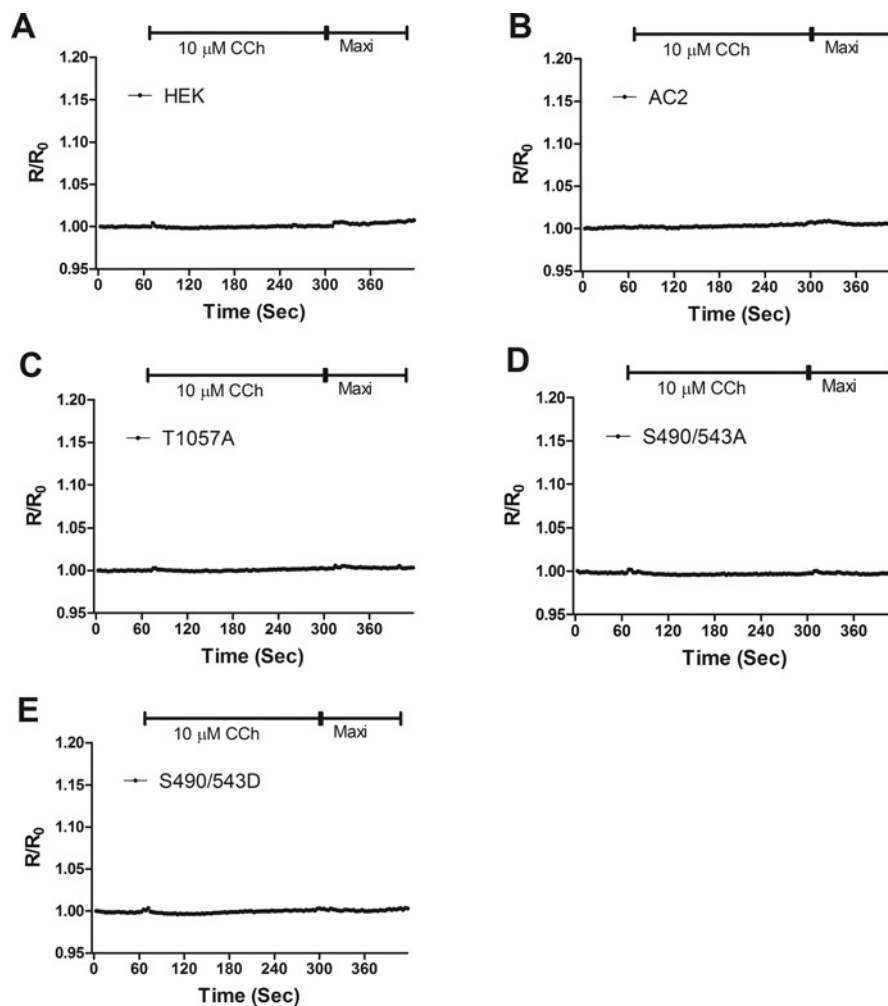

**Figure S1** Changes in the CFP/YFP response of the cells

Changes in the CFP/YFP response ( $R/R_0$ ) of HEK-293 cells (A) or the indicated AC2 constructs (B–E) stable cells transiently transfected with global ('dead') Epac2<sup>R297E</sup> in response to 10 μM CCh. Maximal change in  $R/R_0$  (Maxi) was sought using 100 μM IBMX, 10 μM FSK and 10 μM Iso at 300 s for 2 min. Results are means ± S.E.M.

<sup>1</sup> To whom correspondence should be addressed (email dmfc2@cam.ac.uk).

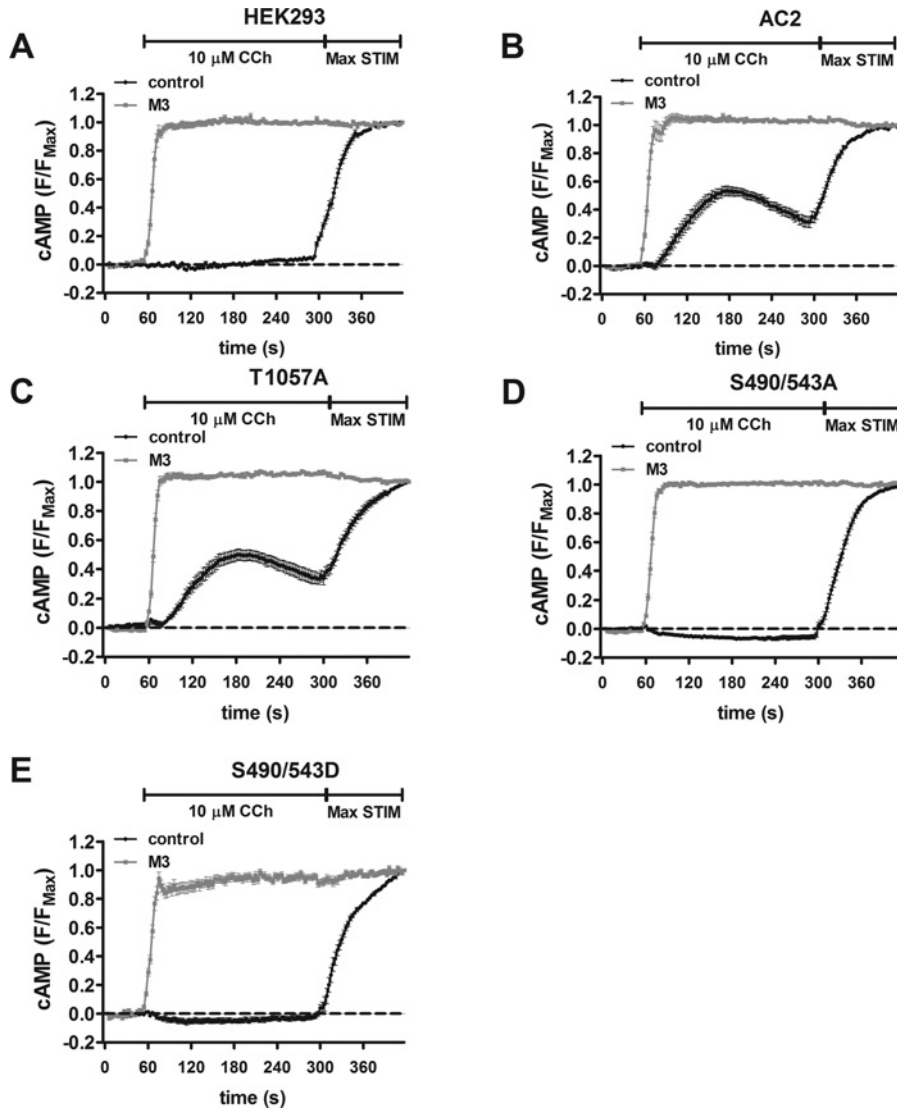

**Figure S2 Effects of overexpressing the M3 receptor on CCh-mediated cAMP activity in single cells**

Untransfected HEK-293 cells (A) and cells stably expressing wild-type AC2 (B), T1057A-AC2 (C), phosphorylation-deficient mutant S490/543A-AC2 (D) and phosphomimetic S490/543A-AC2 (E) transfected with or without the M3 receptor were stimulated with 10 μM CCh at 60 s for 4 min. Results are means ± S.E.M.

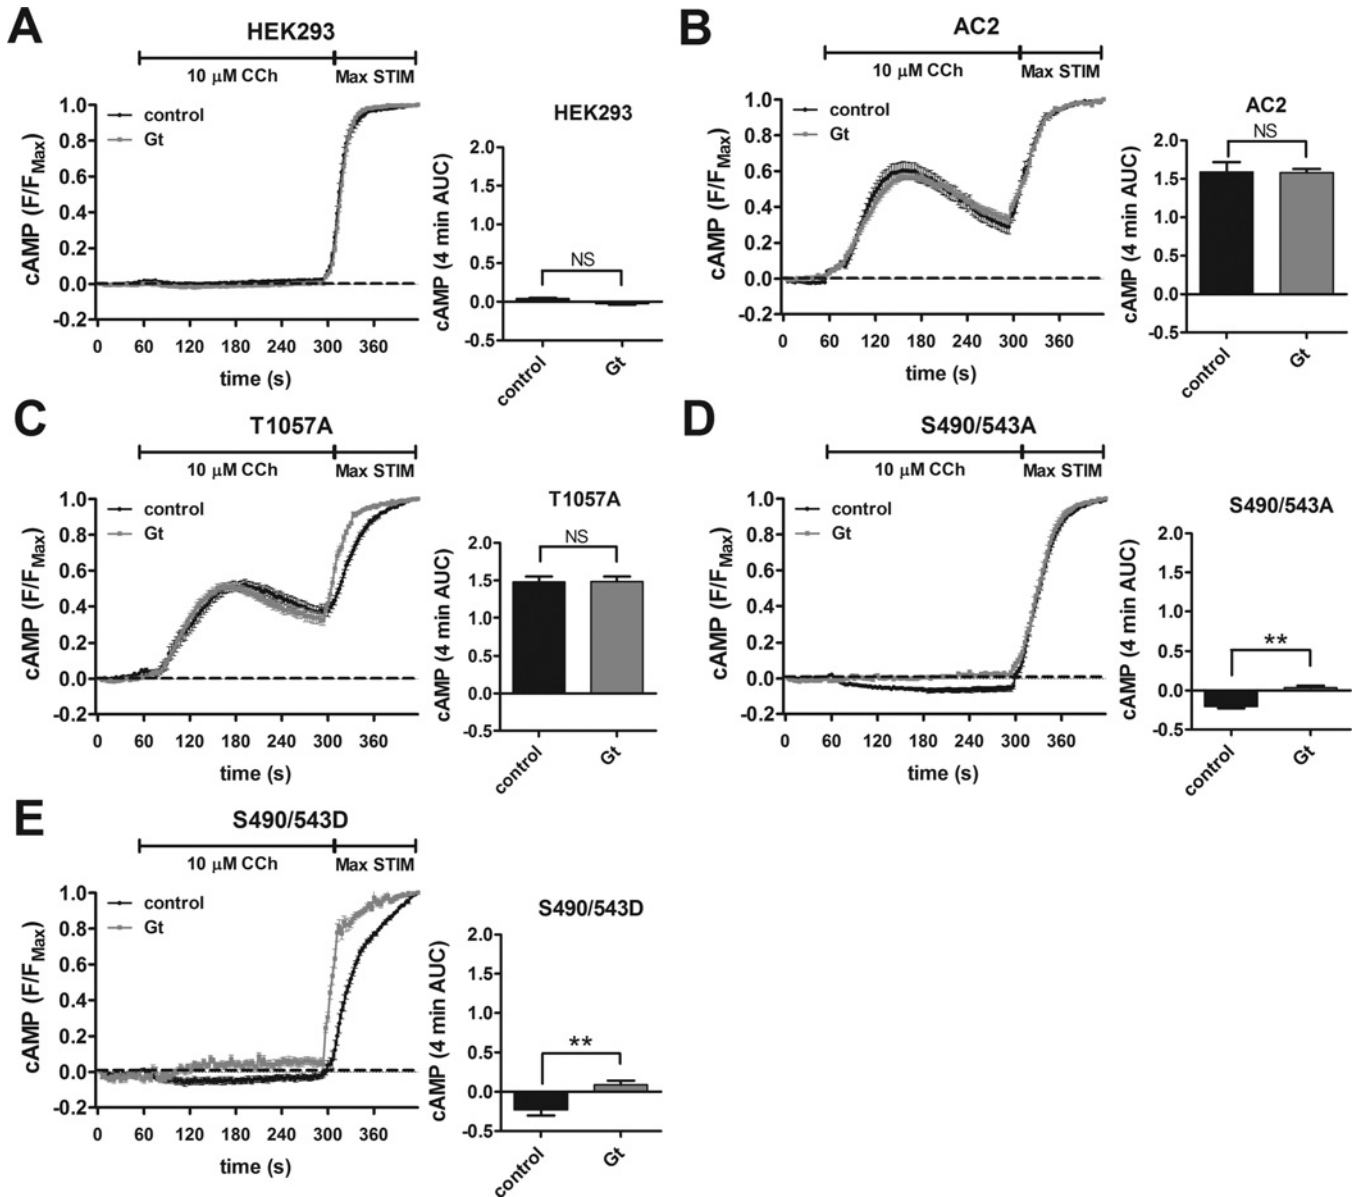

**Figure S3** Effects of overexpressing  $G_{i\alpha}$  (transducin) on CCh-mediated cAMP activity in single cells

Untransfected HEK-293 cells (**A**) and cells stably expressing wild-type AC2 (**B**), T1057A-AC2 (**C**), phosphorylation-deficient mutant S490/543A-AC2 (**D**) and phosphomimetic S490/543A-AC2 (**E**) transfected with or without  $G_{i\alpha}$  were stimulated with 10  $\mu$ M CCh at 60 s for 4 min. The time course of cAMP production is shown in the left-hand panel and the 4 min AUC (calculated from the left-hand panel) is on the right-hand side. Results are means  $\pm$  S.D. \* $P$  < 0.05 and \*\* $P$  < 0.01 using Student's  $t$  test. Max STIM, saturation of the sensor; NS, not significant.

Received 15 February 2012/18 July 2012; accepted 20 August 2012  
Published as BJ Immediate Publication 20 August 2012, doi:10.1042/BJ20120279
